# Supplementary material for: Glycation Interferes with the Expression of Sialyltransferases and Leads to Increased Polysialylation in Glioblastoma Cells
Source: Cells. 2023 Dec 2;12(23):2758. doi: 10.3390/cells12232758 (PMC10706364; doi:10.3390/cells12232758)
Supplement: Supplementary file 1 [file cells-12-02758-s001.zip]

Archive with 4 entries (4 files):
- 2023_11_08 Supplementary Material.pdf
- Supplemental Video1.avi
- Supplemental Video2.avi
- Supplemental Video3.avi
